# Supplementary material for: Comprehensive Characterization of the Multiple Myeloma Immune Microenvironment Using Integrated scRNA-seq, CyTOF, and CITE-seq Analysis
Source: PubMed Central journal article supplement (PMC10035369; doi:10.1158/2767-9764.crc-22-0022), 2022-10-25
Supplement: crc-22-0022-s02.pdf [file crc-22-0022-s02.pdf]

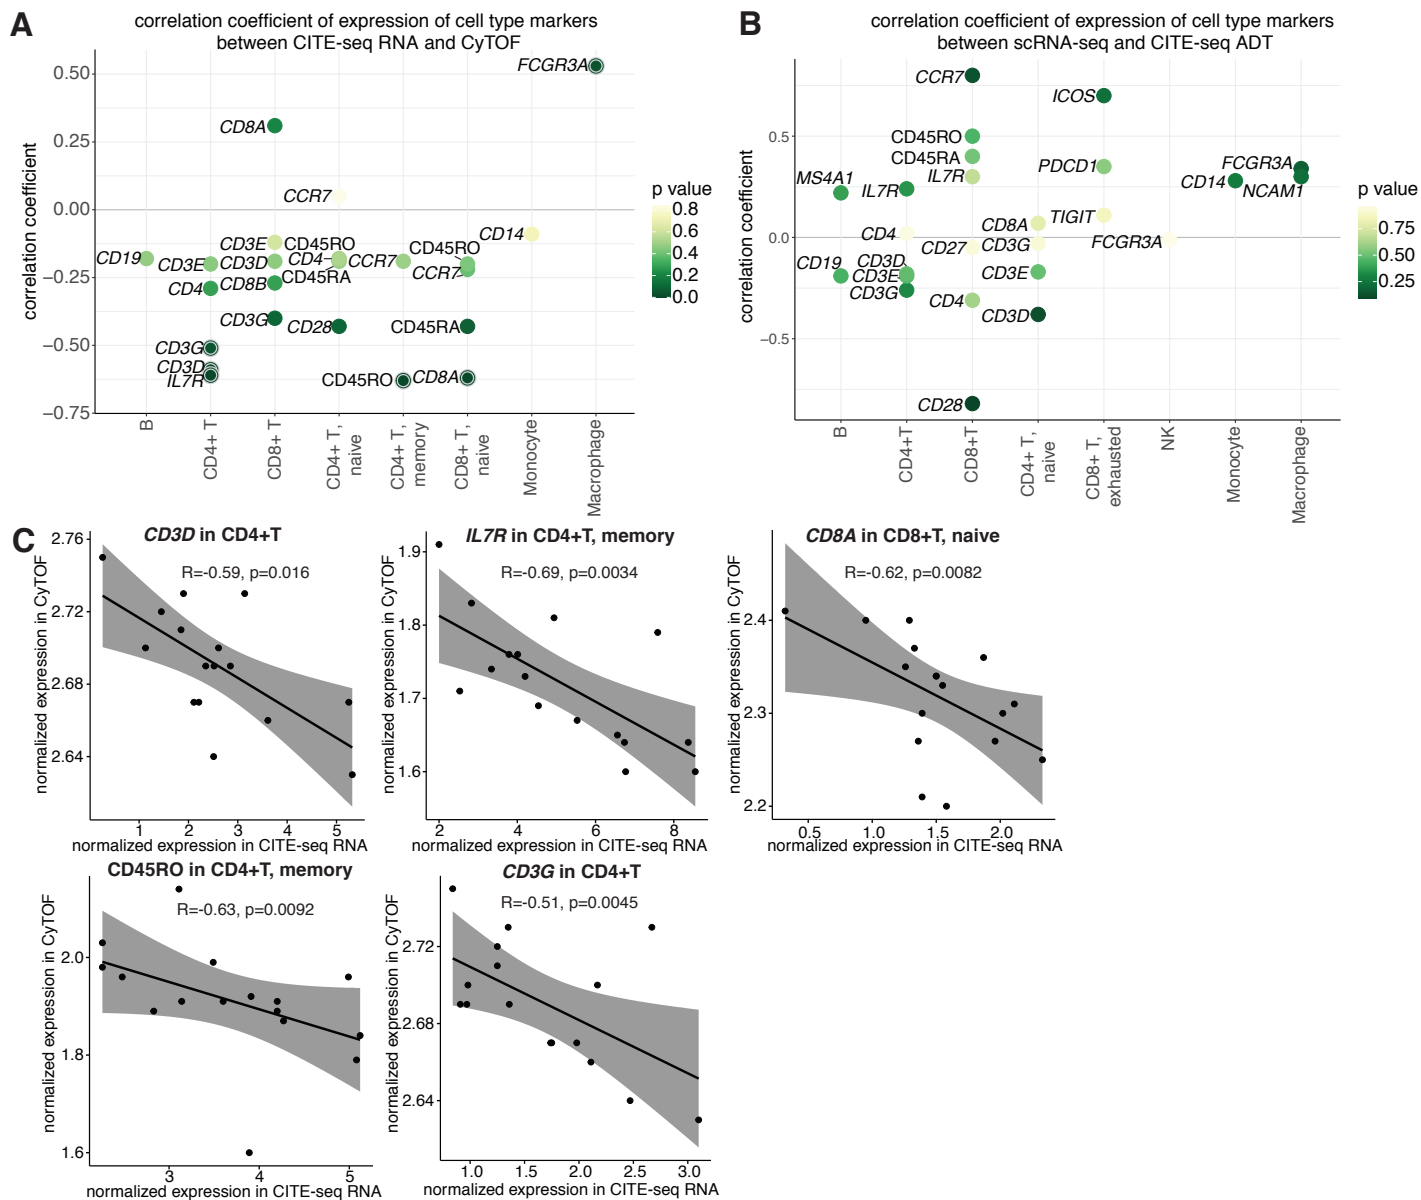

FIGURE S2

## Fig. S2

### Correlation of expression of canonical cell type markers across different modalities.

A) Spearman correlation coefficients of cell type markers between transcriptional level expression from CITE-seq and protein level expression from CyTOF. Each dot represents a marker gene and the color of the dot represents the p value of correlation. Markers are highlighted with an outer circle if the p value is less than 0.05.

B) Spearman correlation coefficients of cell type markers between transcriptional level expression from scRNA-seq and protein level expression from CITE-seq. Each dot represents a marker gene and the color of the dot represents the p value of correlation. Markers are highlighted with an outer circle if the p value is less than 0.05.

C) Scatter plots showing examples of negative correlation of expression of cell type marker genes between transcriptional level expression from CITE-seq and protein level expression from CyTOF. MMRF\_1505 and MMRF\_2251 were excluded due to lack of cell populations of interest based on CITE-seq measurement.
